# Supplementary material for: The role of glutathione in mercury tolerance resembles its function under cadmium stress in Arabidopsis
Source: Royal Society of Chemistry journal article supplement (doi:10.1039/c3mt00329a), 2014-01-01
Supplement: c3mt00329a.pdf [file c3mt00329a.pdf]

## SUPPLEMENTARY MATERIAL

### SUPPLEMENTARY METHODS INFORMATION

#### Plant material

*Arabidopsis thaliana* seedlings of wild type (Col-0), *cad2-1*, *rax1-1* and *cad1-3* genotypes germinated in square Petri dishes for 5 days, were transplanted in a perlite-peat (1:3) mixture and grown for 1 month in a short-days light regime. Leaves were cut in 1 cm diameter disks, placed in 15 mL glass tubes, sealed with silicone septum stoppers, and infiltrated under vacuum with deionised water (control), 3 or 30  $\mu\text{M}$   $\text{CdCl}_2$  or  $\text{HgCl}_2$  solutions (analytical grade  $\geq 99.0\%$ ). The disks were incubated at 20  $^\circ\text{C}$  with continuous illumination for 24 and 48 hours (Fig. S1).

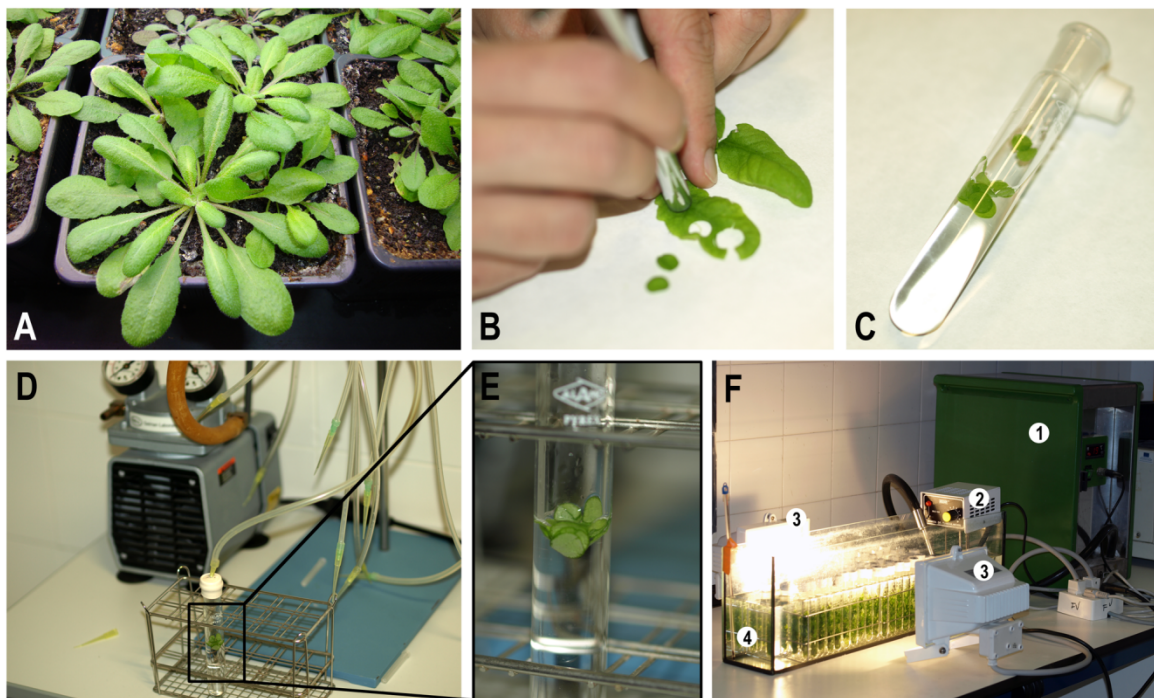

**Supplementary Fig. 1.** **A**, *Arabidopsis* were grown in a perlite-peat (1:3) mixture for 1 month in short-days light regime (8/16 h light/darkness at 25/18 $^\circ\text{C}$  respectively). **B**, Leaves were cut in 1 cm diameter disks. **C**, Disks were introduced in 15 mL glass tubes that were sealed with silicone septum stoppers. **D**, Leaf disks were infiltrated under vacuum with deionized water ( $\text{dH}_2\text{O}$ ), 3 or 30  $\mu\text{M}$   $\text{CdCl}_2$  or  $\text{HgCl}_2$ . **E**, Detail of infiltrated disks. **F**, Incubation of disks at 20  $^\circ\text{C}$ , temperature that was controlled by using a cooling finger device (1), under illumination with halogen lamps for 24 and 48 h (3). A water rotary pump (2) was used to homogenize the temperature of the bath (4).

## Chromatography and mass-spectrometry conditions

Chromatographic separation was carried out by injecting 20  $\mu\text{L}$  aliquots of standard solutions and samples extracts spiked with the internal standards in a Mediterranea SEA18 column (3  $\mu\text{m}$ , 150 x 2.1 mm; Teknokroma, Sant Cugat del Vallès, Spain). Samples were eluted with a gradient mobile phase built with 0.1% formic acid in Milli-Q water (solvent A) and 0.1% (v/v) formic acid in acetonitrile (solvent B) and a flow rate of 250  $\mu\text{L}/\text{min}$ . The gradient program started increasing linearly the concentration of solvent B from 2% to 10% B for 5 min. Then, to wash the column, this proportion was increased linearly to 50% B for 1 min, this solvent composition was maintained for 3 min, and returned linearly to initial conditions in 2 min. The column was then allowed to stabilise for 9 min at the initial conditions before the next injection. Autosampler and column temperatures were 6 and 30°C, respectively. The total exit flow from the column was loaded into the ESI interface of the MS(TOF) apparatus from the HPLC using a 125  $\mu\text{m}$  i.d. PEEK tube (Upchurch Scientific, Oak Harbor, WA). The MS(TOF) operated in negative ion mode at -500 and 3000 V of endplate and spray tip voltages, respectively. The orifice voltage was set at -90 V to acquire spectra in the mass-to-charge ratio ( $m/z$ ) ranges of 50-1000. The nebulizer gas ( $\text{N}_2$ ) pressure, drying gas ( $\text{N}_2$ ) flow rate and drying gas temperature were 2.7 bar, 8.5  $\text{L min}^{-1}$  and 200 °C.

To check the modifications in the method described by Rellán-Álvarez *et al.*<sup>24</sup>, basically regarding to the type of column and chromatographic conditions, we run mixtures of ASA, GSH and GSSG with internal standards, obtaining a sufficient separation of the analytes: ASA/ASA\* co-eluted at 3.2 min, GSH/GSH\* co-eluted at 3.5 min, and GSSG had a longer retention time of 5.1 min (Fig. S2). Concentrations of GSH, GSSG and ASA were always quantified by external calibration with internal standardization.

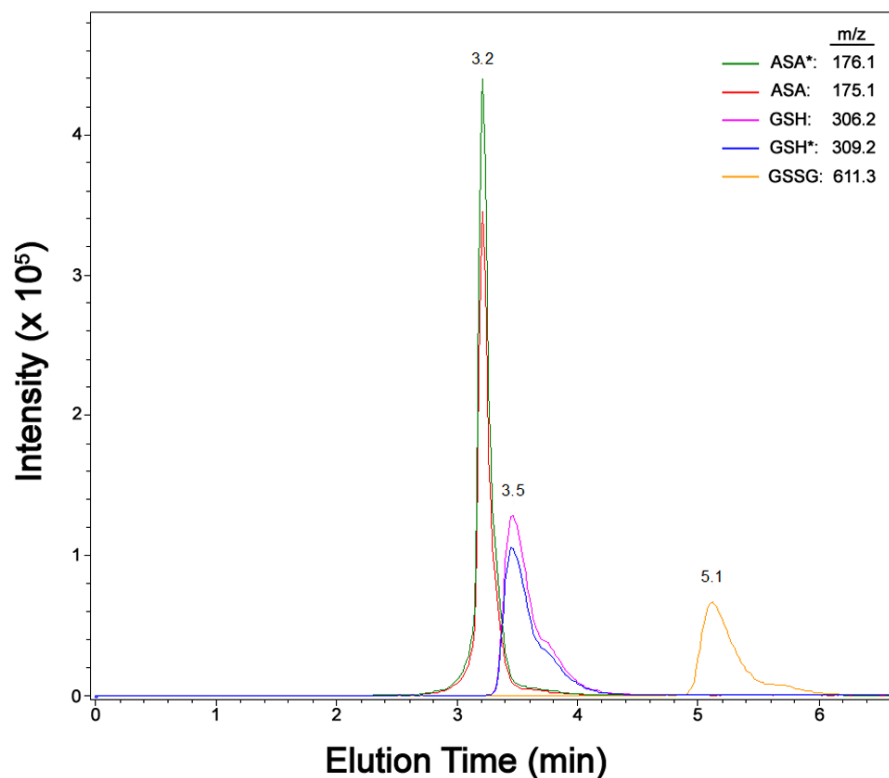

**Supplementary Fig. 2.** Typical chromatogram of a mixture of standards: 100  $\mu\text{M}$  ASA\*, 100  $\mu\text{M}$  ASA, 100  $\mu\text{M}$  GSH, 75  $\mu\text{M}$  GSH\*, 25  $\mu\text{M}$  GSSG. Numbers on top of the peaks represent retention times in minutes.

## SUPPLEMENTARY RESULTS

### SUPPLEMENTARY TABLE 1

Concentration of biothiols (nmol/g FW) in leaf disks of *Arabidopsis* infiltrated with 0, 3 and 30  $\mu\text{M}$  Cd or Hg and incubated for 24 and 48 h was analyzed by conventional HPLC and postcolumn derivatization with Ellman's reagent. The quantification of the concentration was performed by the addition of an internal standard N-acetylcysteine and relative to the weight of sample (100 mg). These results are shown graphically in Figure 2 using spheres with different colour for each detected biothiols, which concentrations are represented by different diameters.

**Sup. Table 1.** Concentration of biothiols (nmol g<sup>-1</sup> FW) in disks of Wild type (Col-0), *cad2-1*, *rax1-1* and *cad1-3* *A. thaliana* leaves treated with 0, 3 and 30 μM Cd or Hg for 24 and 48 h. Different letters denote significant differences between treatments and genotypes at *p* < 0.05 (except Cys 24 h *P* < 0.1). n.d. (not detected).

|          |          | Cys           | GSH                          | PC <sub>2</sub>               | PC <sub>3</sub>            | PC <sub>4</sub>            | PC <sub>5</sub>           |                          |
|----------|----------|---------------|------------------------------|-------------------------------|----------------------------|----------------------------|---------------------------|--------------------------|
| 24 hours | Control  | Col-0         | 38.10 <sup>a</sup> ± 4.13    | 297.98 <sup>fg</sup> ± 22.85  |                            |                            |                           |                          |
|          |          | <i>cad2-1</i> | 53.95 <sup>bc</sup> ± 3.12   | 117.59 <sup>abc</sup> ± 31.76 |                            |                            |                           |                          |
|          |          | <i>rax1-1</i> | 45.17 <sup>ab</sup> ± 6.50   | 237.03 <sup>ef</sup> ± 32.84  |                            |                            |                           |                          |
|          |          | <i>cad1-3</i> | 65.82 <sup>cd</sup> ± 10.96  | 504.22 <sup>h</sup> ± 25.57   |                            |                            |                           |                          |
|          | 3 μM Cd  | Col-0         | 38.43 <sup>a</sup> ± 4.02    | 330.73 <sup>g</sup> ± 33.62   | 23.11 <sup>a</sup> ± 8.51  | 8.76 <sup>a</sup> ± 0.67   |                           |                          |
|          |          | <i>cad2-1</i> | 62.83 <sup>cd</sup> ± 3.67   | 74.99 <sup>ab</sup> ± 10.09   |                            |                            |                           |                          |
|          |          | <i>rax1-1</i> | 56.75 <sup>bcd</sup> ± 12.09 | 226.96 <sup>c</sup> ± 25.31   | 16.56 <sup>a</sup> ± 1.35  |                            |                           |                          |
|          |          | <i>cad1-3</i> | 43.36 <sup>ab</sup> ± 6.15   | 476.64 <sup>h</sup> ± 40.81   |                            |                            |                           |                          |
|          | 30 μM Cd | Col-0         | 40.79 <sup>ab</sup> ± 10.09  | 150.59 <sup>cd</sup> ± 7.21   | 37.32 <sup>b</sup> ± 5.15  | 25.44 <sup>b</sup> ± 3.21  | 13.34 <sup>a</sup> ± 2.51 |                          |
|          |          | <i>cad2-1</i> | 192.84 <sup>f</sup> ± 11.77  | 57.36 <sup>a</sup> ± 8.36     |                            |                            |                           |                          |
|          |          | <i>rax1-1</i> | 62.65 <sup>cd</sup> ± 7.43   | 85.96 <sup>ab</sup> ± 13.90   | 18.34 <sup>a</sup> ± 2.48  | 12.77 <sup>a</sup> ± 2.55  | 9.12 <sup>a</sup> ± 1.12  |                          |
|          |          | <i>cad1-3</i> | 103.83 <sup>e</sup> ± 5.38   | 133.16 <sup>bc</sup> ± 1.60   |                            |                            |                           |                          |
|          | 3 μM Hg  | Col-0         | 38.91 <sup>ab</sup> ± 3.55   | 306.79 <sup>g</sup> ± 16.54   |                            |                            |                           |                          |
|          |          | <i>cad2-1</i> | 72.13 <sup>d</sup> ± 4.30    | 115.58 <sup>abc</sup> ± 13.68 |                            |                            |                           |                          |
|          |          | <i>rax1-1</i> | 61.30 <sup>cd</sup> ± 9.70   | 239.41 <sup>efg</sup> ± 1.44  |                            |                            |                           |                          |
|          |          | <i>cad1-3</i> | 52.40 <sup>abc</sup> ± 5.01  | 527.38 <sup>h</sup> ± 38.01   |                            |                            |                           |                          |
|          | 30 μM Hg | Col-0         | 47.09 <sup>abc</sup> ± 5.15  | 209.88 <sup>de</sup> ± 15.24  | 16.99 <sup>a</sup> ± 2.47  | 10.53 <sup>a</sup> ± 1.58  |                           |                          |
|          |          | <i>cad2-1</i> | 40.07 <sup>ab</sup> ± 3.12   | 60.72 <sup>ab</sup> ± 19.77   |                            |                            |                           |                          |
|          |          | <i>rax1-1</i> | 46.96 <sup>abc</sup> ± 0.02  | 105.76 <sup>abc</sup> ± 15.92 | 14.10 <sup>a</sup> ± 1.33  |                            |                           |                          |
|          |          | <i>cad1-3</i> | 72.67 <sup>d</sup> ± 6.53    | 245.71 <sup>ef</sup> ± 34.30  |                            |                            |                           |                          |
| 48 hours | Control  | Col-0         | 74.11 <sup>ab</sup> ± 8.27   | 442.01 <sup>ab</sup> ± 41.73  |                            |                            |                           |                          |
|          |          | <i>cad2-1</i> | 65.73 <sup>a</sup> ± 17.34   | 163.66 <sup>ef</sup> ± 25.35  |                            |                            |                           |                          |
|          |          | <i>rax1-1</i> | 57.44 <sup>a</sup> ± 7.68    | 291.00 <sup>c</sup> ± 33.06   |                            |                            |                           |                          |
|          |          | <i>cad1-3</i> | 90.25 <sup>bc</sup> ± 15.07  | 419.64 <sup>b</sup> ± 39.46   |                            |                            |                           |                          |
|          | 3 μM Cd  | Col-0         | 58.60 <sup>ab</sup> ± 17.66  | 398.38 <sup>bd</sup> ± 34.80  | 24.16 <sup>ab</sup> ± 0.98 | 32.27 <sup>a</sup> ± 12.06 | 9.73 <sup>a</sup> ± 2.08  |                          |
|          |          | <i>cad2-1</i> | 141.00 <sup>d</sup> ± 4.41   | 165.48 <sup>c</sup> ± 19.79   |                            |                            |                           |                          |
|          |          | <i>rax1-1</i> | 77.56 <sup>ab</sup> ± 5.24   | 189.06 <sup>c</sup> ± 18.79   | 17.62 <sup>a</sup> ± 1.26  |                            |                           |                          |
|          |          | <i>cad1-3</i> | 89.55 <sup>ab</sup> ± 7.08   | 335.29 <sup>cd</sup> ± 19.66  |                            |                            |                           |                          |
|          | 30 μM Cd | Col-0         | 79.46 <sup>ab</sup> ± 8.64   | 439.16 <sup>ab</sup> ± 46.15  | 110.68 <sup>d</sup> ± 1.97 | 104.44 <sup>c</sup> ± 7.89 | 30.81 <sup>b</sup> ± 4.72 | 5.93 <sup>a</sup> ± 0.16 |
|          |          | <i>cad2-1</i> | 113.25 <sup>cd</sup> ± 24.13 | 99.52 <sup>ef</sup> ± 16.03   | 24.25 <sup>ab</sup> ± 9.05 | 17.72 <sup>b</sup> ± 5.20  |                           |                          |
|          |          | <i>rax1-1</i> | 62.69 <sup>ab</sup> ± 0.96   | 133.87 <sup>e</sup> ± 29.97   | 34.86 <sup>bc</sup> ± 4.05 | 22.90 <sup>ab</sup> ± 1.15 | 8.36 <sup>a</sup> ± 0.88  |                          |
|          |          | <i>cad1-3</i> | 102.93 <sup>cd</sup> ± 14.70 | 185.09 <sup>e</sup> ± 69.97   |                            |                            |                           |                          |
|          | 3 μM Hg  | Col-0         | 157.59 <sup>d</sup> ± 20.68  | 407.99 <sup>bd</sup> ± 7.61   |                            |                            |                           |                          |
|          |          | <i>cad2-1</i> | 125.80 <sup>cd</sup> ± 22.54 | 178.93 <sup>e</sup> ± 13.80   |                            |                            |                           |                          |
|          |          | <i>rax1-1</i> | 84.39 <sup>ab</sup> ± 14.81  | 245.15 <sup>cc</sup> ± 18.98  |                            |                            |                           |                          |
|          |          | <i>cad1-3</i> | 82.71 <sup>ab</sup> ± 20.47  | 376.88 <sup>bc</sup> ± 8.03   |                            |                            |                           |                          |
|          | 30 μM Hg | Col-0         | 71.28 <sup>ab</sup> ± 10.49  | 494.73 <sup>a</sup> ± 19.97   | 40.49 <sup>c</sup> ± 6.19  | 11.80 <sup>b</sup> ± 1.87  |                           |                          |
|          |          | <i>cad2-1</i> | n.d.                         | 42.54 <sup>f</sup> ± 13.81    |                            |                            |                           |                          |
|          |          | <i>rax1-1</i> | 46.58 <sup>a</sup> ± 8.36    | 148.87 <sup>e</sup> ± 11.97   | 15.87 <sup>a</sup> ± 0.71  | 11.00 <sup>b</sup> ± 0.65  |                           |                          |
|          |          | <i>cad1-3</i> | 75.34 <sup>ab</sup> ± 16.31  | 338.84 <sup>cd</sup> ± 44.76  |                            |                            |                           |                          |
